# Supplementary material
Source: MDPI journal article supplement (https://www.mdpi.com/1999-4907/14/10/2107)
Supplement: s1 [file s1]

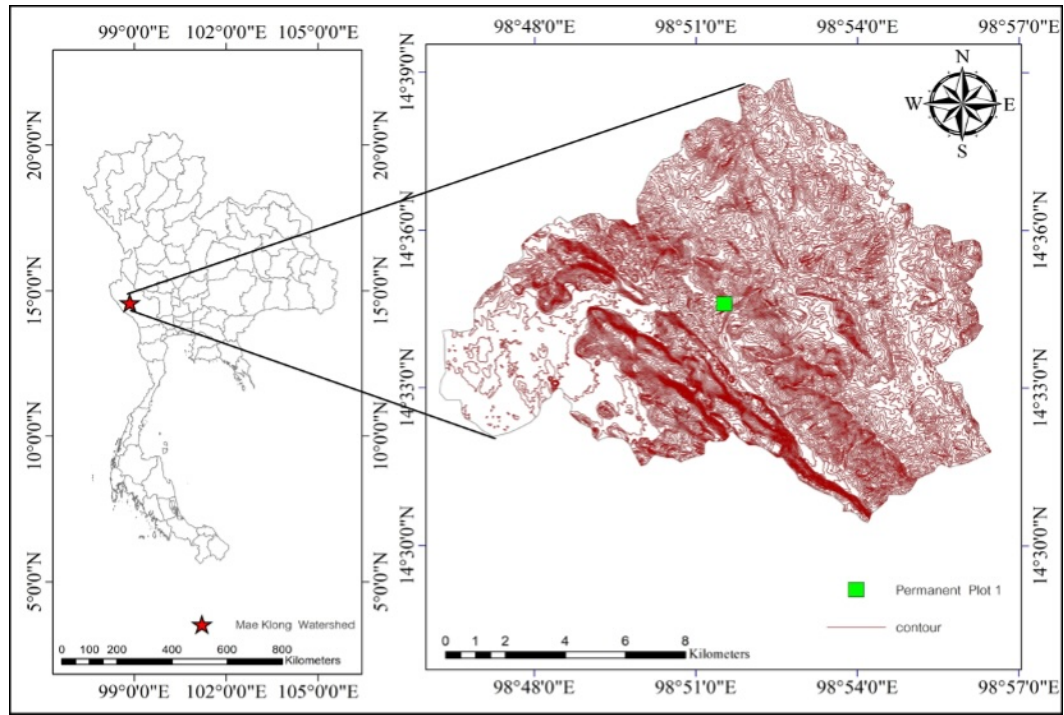

**Figure S1.** The location of permanent plot in the mixed deciduous forest of the Mae Klong Watershed Re-search Station (MKWRS), Kanchanaburi province, western Thailand.

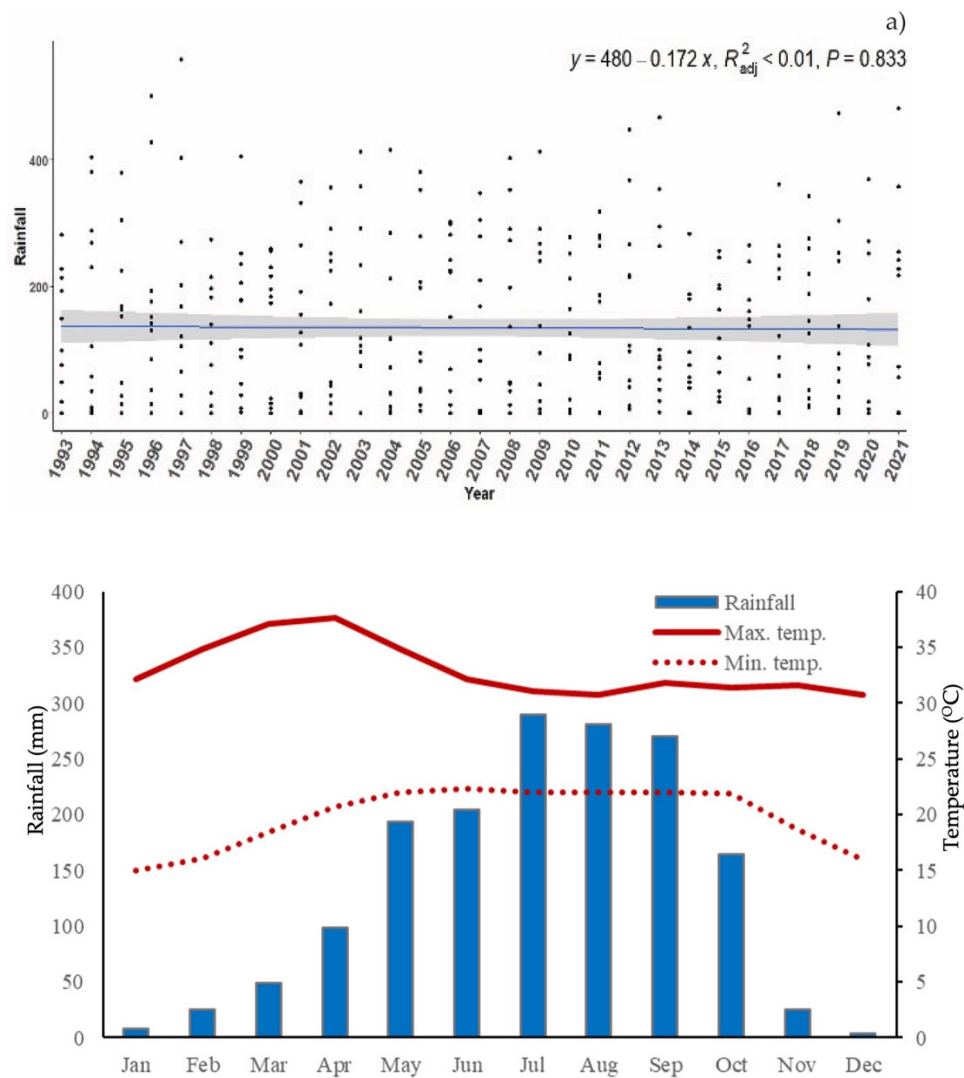

**Figure S2.** a) Monthly rainfall variation (dots) and b) total monthly rainfall with mean monthly maximum and minimum temperature for 1992–2021 at MKWRS, western Thailand.
